# Supplementary material for: Intense Near-Infrared Light-Emitting NaYF4:Nd,Yb-Based Nanophosphors for Luminescent Solar Concentrators
Source: MDPI journal article supplement (doi:10.3390/ma16083187), 2023-04-18
Supplement: s1 [file s1]

# Intense Near-Infrared Light-Emitting NaYF<sub>4</sub>:Nd,Yb-Based Nanophosphors for Luminescent Solar Concentrators

A-Ra Hong <sup>1</sup>, Seungyong Shin <sup>1</sup>, Gumin Kang <sup>2</sup>, Hyungduk Ko <sup>2</sup>, and Ho Seong Jang <sup>1,3,\*</sup>

<sup>1</sup> Materials Architecturing Research Center, Korea Institute of Science and Technology, 5, Hwarang-ro 14-gil, Seongbuk-gu, Seoul 02792, Republic of Korea; kongr.hongr@gmail.com (A.-R.H.); ljhb0211@kist.re.kr (S.S.)

<sup>2</sup> Nanophotonics Research Center, Korea Institute of Science and Technology, 5, Hwarang-ro 14-gil, Seongbuk-gu, Seoul 02792, Republic of Korea; guminkang@kist.re.kr (G.K.); kohd94@kist.re.kr (H.K.)

<sup>3</sup> Division of Nano & Information Technology, KIST School, Korea University of Science and Technology (UST), Seoul 02792, Republic of Korea

\* Correspondence: msekorea@kist.re.kr; Tel.: +82-2-958-5263

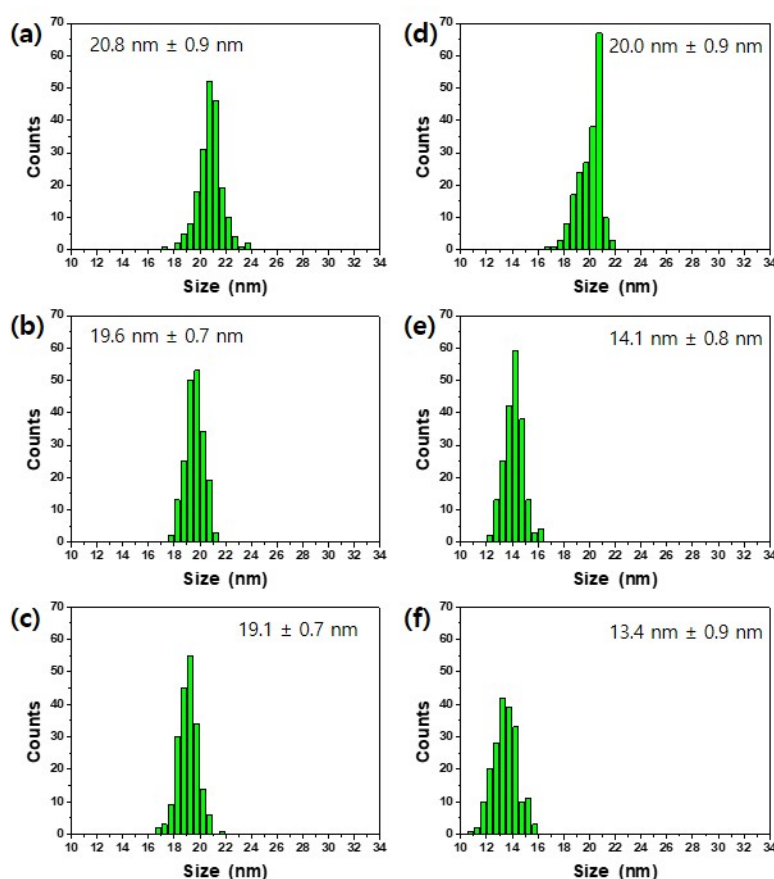

**Figure S1.** Size distributions of NaYF<sub>4</sub>:Nd(x%),Yb(10%) core DSNPs with various Nd<sup>3+</sup> concentrations [x = (a) 10%, (b) 20%, (c) 25%, (d) 30%, (e) 40%, and (f) 50%].

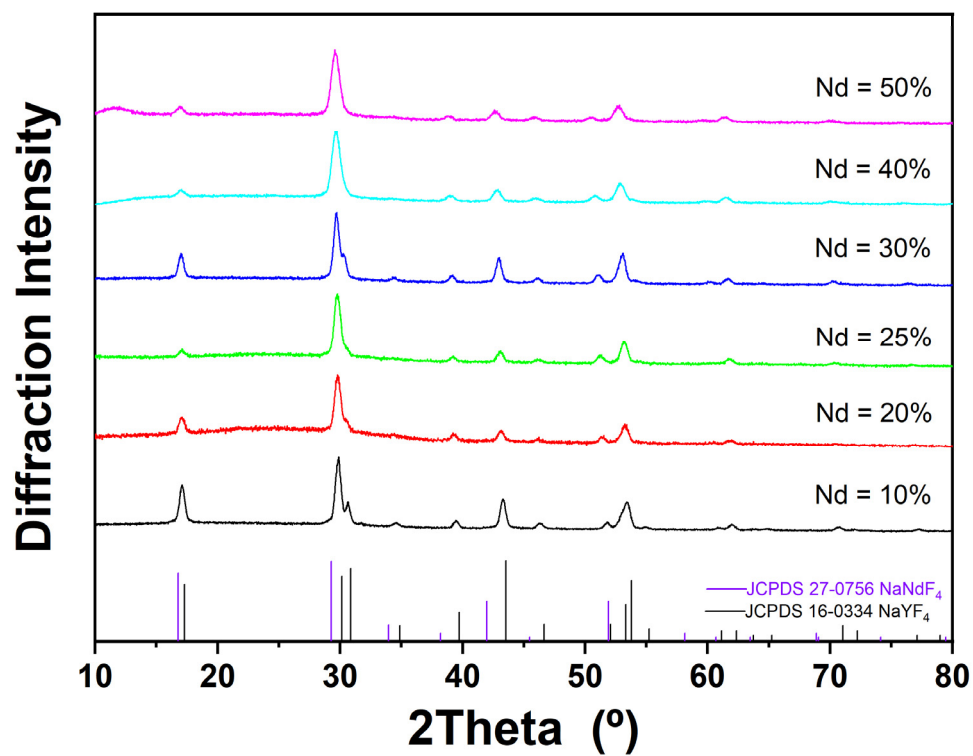

**Figure S2.** XRD patterns of NaYF<sub>4</sub>:Nd(x%),Yb(10%) core DSNPs with various Nd<sup>3+</sup> concentrations [x = 10, 20, 25, 30, 40, and 50%].

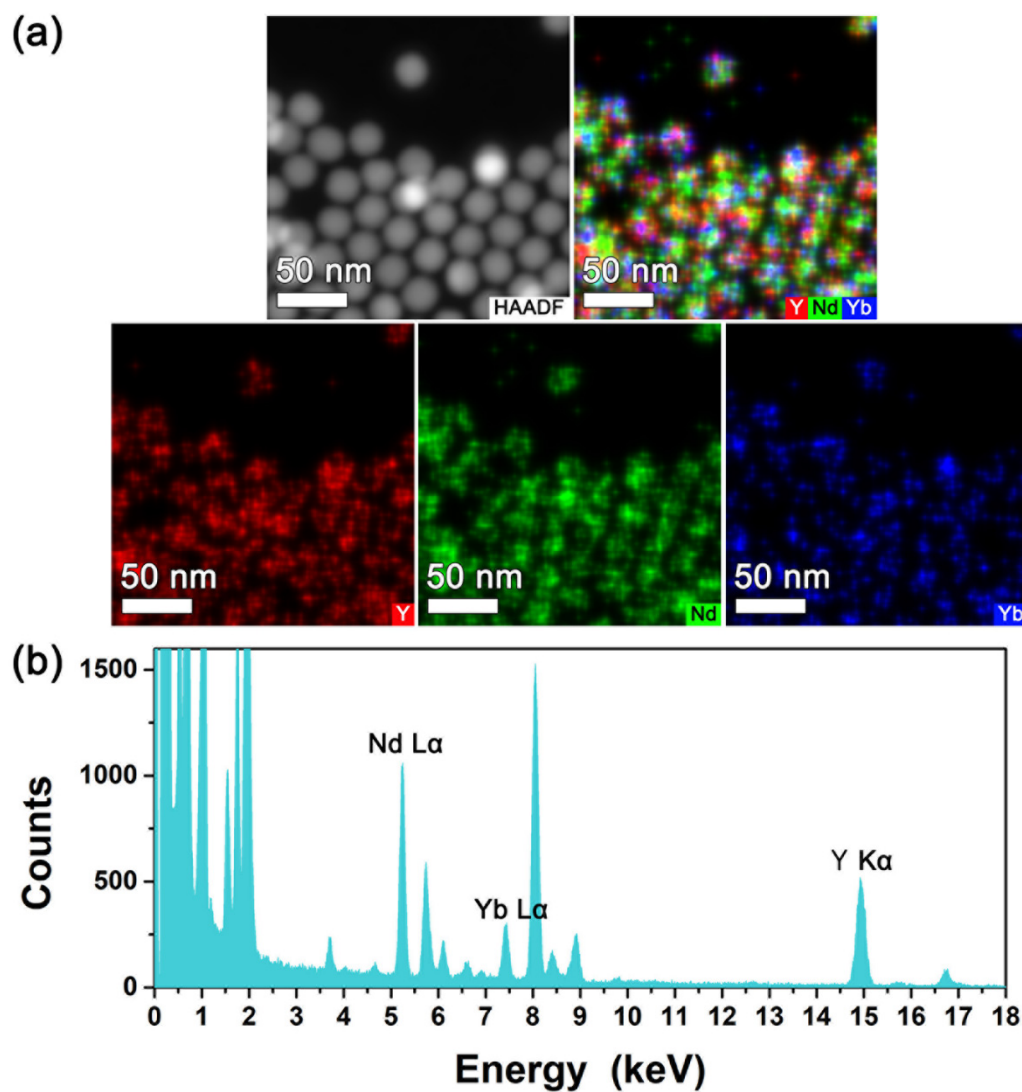

**Figure S3.** (a) HAADF-STEM image and EDS map images (merged image, Y K $\alpha$ , Nd L $\alpha$ , and Yb L $\alpha$  map images) of NaYF<sub>4</sub>:Nd(30%),Yb(10%) core DSNPs. (b) EDS spectrum of NaYF<sub>4</sub>:Nd(30%),Yb(10%) core DSNPs.

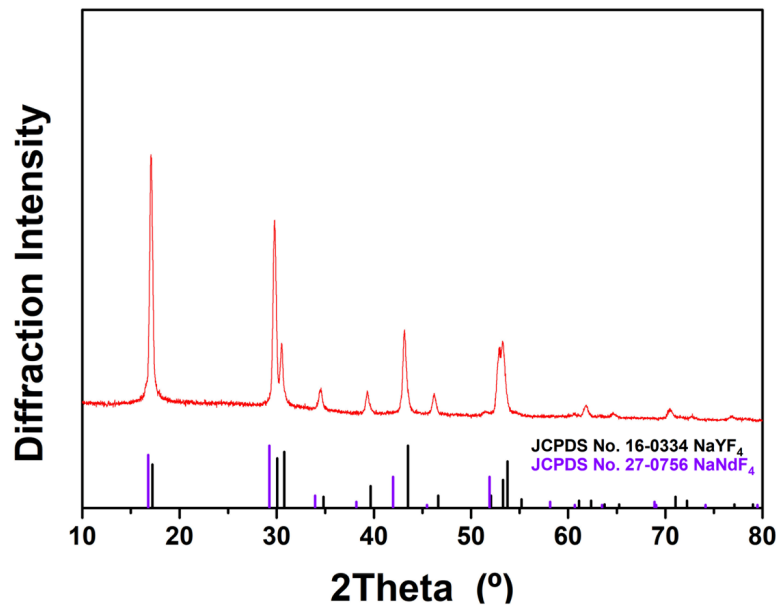

**Figure S4.** XRD pattern of NaYF<sub>4</sub>:Nd(30%),Yb(10%)/NaYF<sub>4</sub>:Nd(10%)/NaYF<sub>4</sub> C/S/S DSNPs.

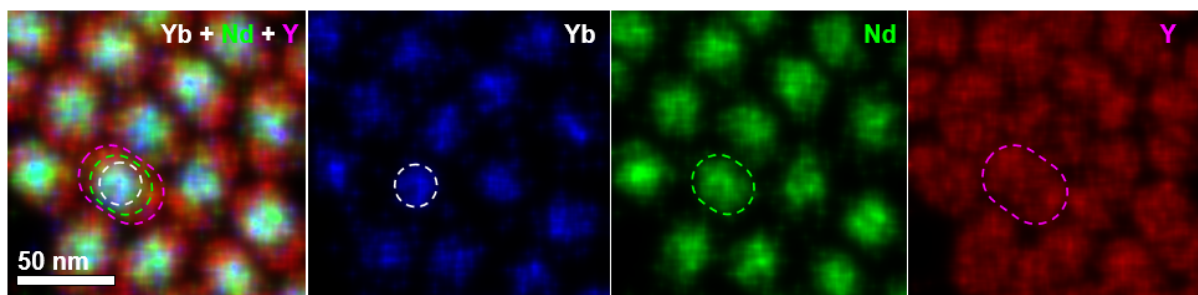

**Figure S5.** EDS map images showing the distribution of Yb (blue color), Nd (green color), and Y (red color) of the NaYF<sub>4</sub>:Nd(30%),Yb(10%)/NaYF<sub>4</sub>:Nd(10%)/NaYF<sub>4</sub> C/S/S DSNPs. The composite EDS map image clearly demonstrates that the synthesized DSNPs have core/shell/shell structure.

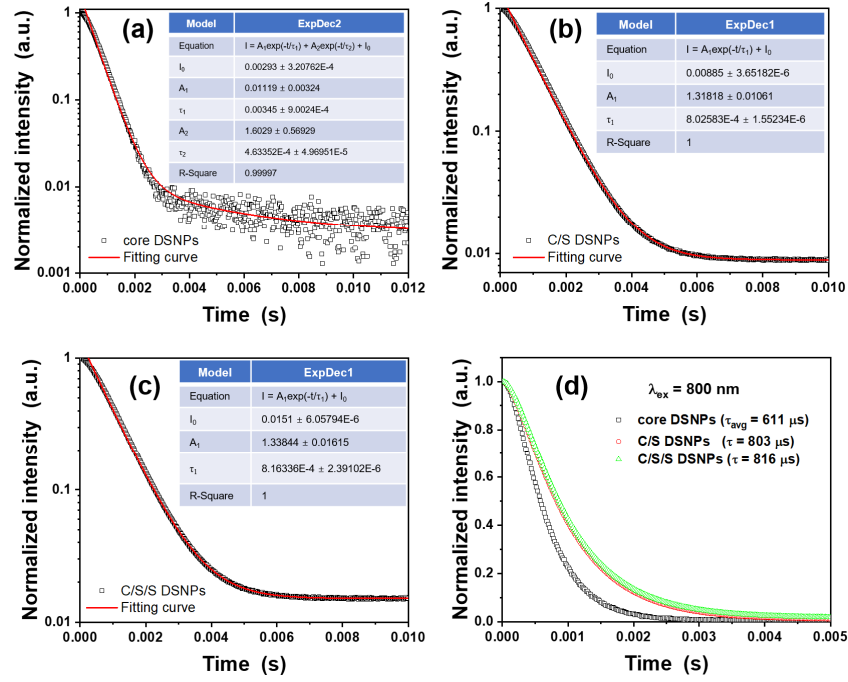

**Figure S6.** Time-resolved PL profiles with fitted curves of (a) NaYF<sub>4</sub>:Nd(30%),Yb(10%) core DSNPs, (b) NaYF<sub>4</sub>:Nd(30%),Yb(10%)/NaYF<sub>4</sub>:Nd(10%) C/S DSNPs, and (c) NaYF<sub>4</sub>:Nd(30%),Yb(10%)/NaYF<sub>4</sub>:Nd(10%)/NaYF<sub>4</sub> C/S/S DSNPs under 800 nm excitation. (d) Time-resolved PL profiles of NaYF<sub>4</sub>:Nd(30%),Yb(10%) core DSNPs (black square), NaYF<sub>4</sub>:Nd(30%),Yb(10%)/NaYF<sub>4</sub>:Nd(10%) C/S DSNPs, (red circle), and NaYF<sub>4</sub>:Nd(30%),Yb(10%)/NaYF<sub>4</sub>:Nd(10%)/NaYF<sub>4</sub> C/S/S DSNPs (green triangle). In the case of the core DSNPs, the average PL lifetime can be obtained by using a following Equation (S1) [S1],

$$\tau_{avg} = \frac{A_1 \tau_1^2 + A_2 \tau_2^2}{A_1 \tau_1 + A_2 \tau_2} \quad \text{----- (S1)}$$

For the core DSNPs, the average PL lifetime ( $\tau_{avg}$ ) was calculated to be 611  $\mu s$ .

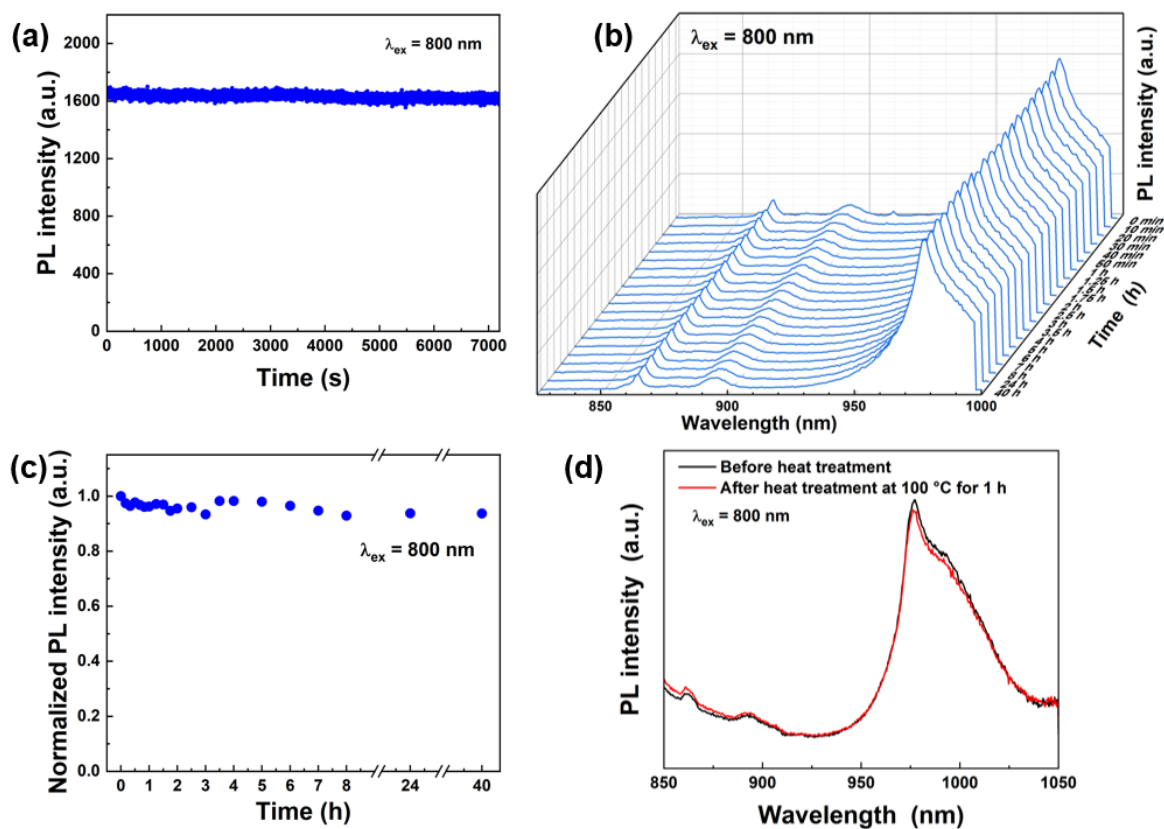

**Figure S7.** (a) PL intensities of the NaYF<sub>4</sub>:Nd(30%),Yb(10%)/NaYF<sub>4</sub>:Nd(10%)/NaYF<sub>4</sub> C/S/S DSNPs monitored at 978 nm under continuous irradiation with an 800 nm NIR laser (27.2 W·cm<sup>-2</sup>). (b) PL spectra and (c) normalized PL intensities of the NaYF<sub>4</sub>:Nd(30%),Yb(10%)/NaYF<sub>4</sub>:Nd(10%)/NaYF<sub>4</sub> C/S/S DSNPs under irradiation with a 365 nm UV lamp (6 W). (d) PL spectra of the NaYF<sub>4</sub>:Nd(30%),Yb(10%)/NaYF<sub>4</sub>:Nd(10%)/NaYF<sub>4</sub> C/S/S DSNPs before and after heat treatment at 100 °C for 1 h.

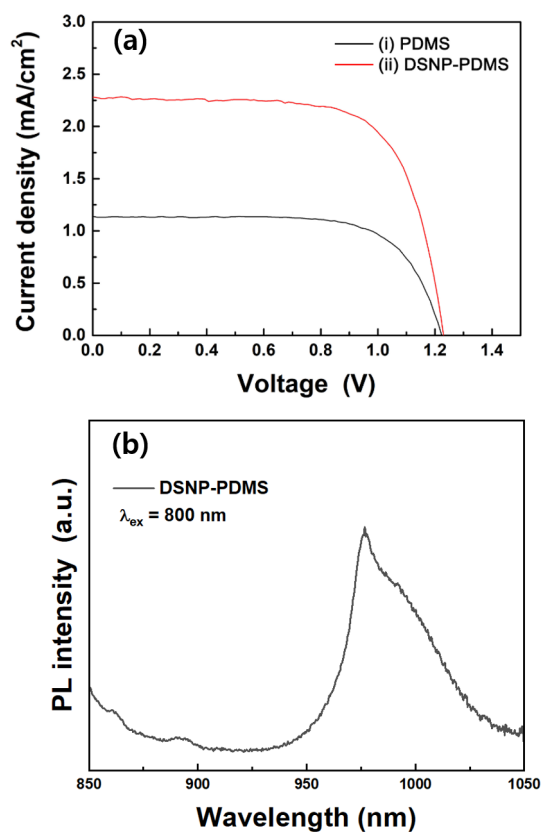

**Figure S8.** (a) Current density versus voltage curves of (i) bare PDMS- and (ii) C/S/S DSNP-PDMS composite-coupled silicon solar cells. (b) PL spectrum of the C/S/S DSNP-PDMS composite under excitation with 800 nm NIR light (1 mW).

#### Reference

[S1] Kıbrıslı, O.; Vahedigharehchopogh, N.; Ersundu, A. E.; Çelikkilek Ersundu, M. Instantaneous Color Tuning of Upconversion Emission in a Novel Lanthanide-Doped Monolithic Glass via Excitation Modulation. *J. Phys. Chem. C* **2020**, *124*, 10687-10695.
